# Supplementary material for: Bi-metallic boride electrocatalysts with enhanced activity for the oxygen evolution reaction
Source: Royal Society of Chemistry journal article supplement (doi:10.1039/c8nr02198h), 2018-01-01
Supplement: c8nr02198h1.pdf [file c8nr02198h1.pdf]

# Electronic Supplementary Information

## Bi-metallic boride electrocatalysts with enhanced activity for oxygen evolution reaction

Jian Zhang<sup>a</sup>, Xianxian Li<sup>a</sup>, Yiteng Liu<sup>a</sup>, zhaowei Zeng<sup>a</sup>, Xu Cheng<sup>a</sup>, Yadong Wang<sup>\*a,b</sup>,  
Wenmao Tu<sup>\*a</sup>, and Mu Pan<sup>a,b</sup>

<sup>a</sup> State Key Laboratory of Advanced Technology for Materials Synthesis and Processing, Wuhan University of Technology, Wuhan 430070, PR China. E-mail: ywang@whut.edu.cn; tuwm@whut.edu.cn Fax: +86-27-87879468; Tel: +86-27-87651839

<sup>b</sup> Key Laboratory of Fuel Cell Technology of Hubei Province, Wuhan University of Technology, Wuhan 430070, PR China.

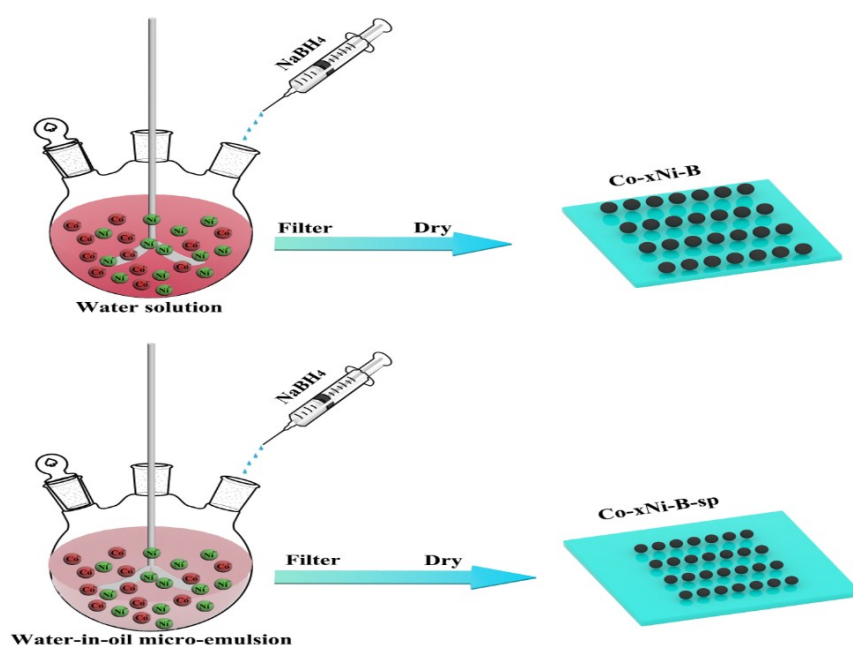

Scheme S1. Schematic illustration for the preparation process of Ni-Co boride.

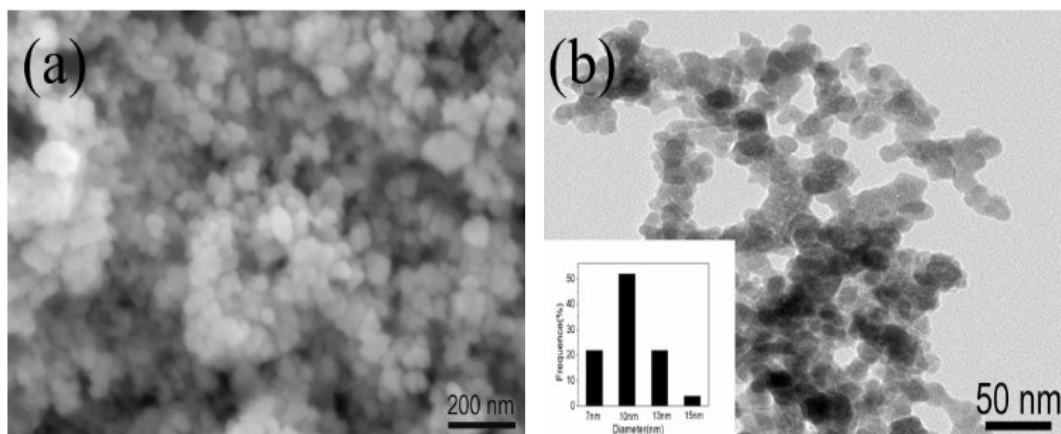

Figure S1. (a) SEM image of Co-10Ni-B-sp. (b) TEM image of Co-10Ni-B-sp.

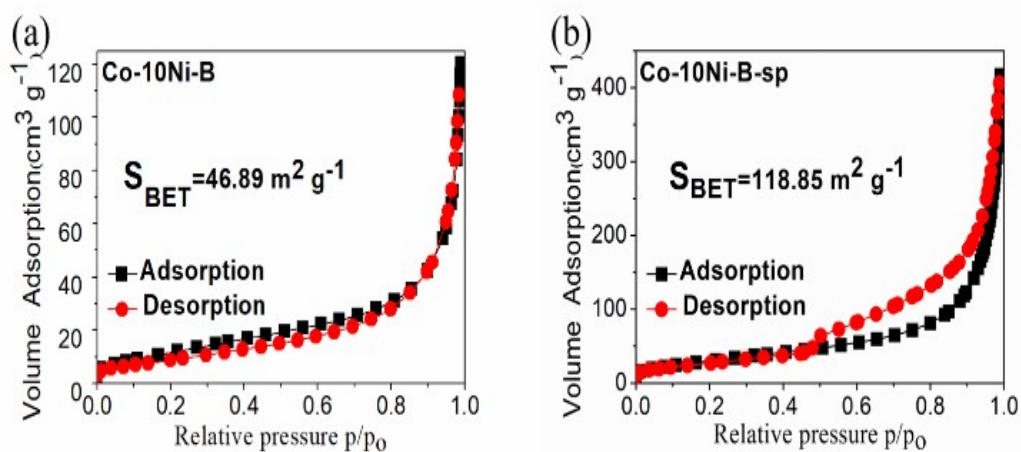

Figure S2. (a) N<sub>2</sub> adsorption–desorption isotherms of Co-10Ni-B. (b). N<sub>2</sub> adsorption–desorption isotherms of Co-10Ni-B-sp.

**Table S1.** Elemental composition of B and Co in Co-B, Co-5Ni-B, Co-10Ni-B, Co-15Ni-B, Co-20Ni-B, Ni-B

| Sample    | Cosition(wt%) |        |       | Molar content of Ni |
|-----------|---------------|--------|-------|---------------------|
|           | Co            | Ni     | B     | Ni/(Ni + Co) atm%   |
| Co-B      | 75.04%        | --     | 5.67% | 0%                  |
| Co-5Ni-B  | 79.79%        | 3.58%  | 6.81% | 4.31%               |
| Co-10Ni-B | 73.07%        | 7.04%  | 6.99% | 8.82%               |
| Co-15Ni-B | 70.31%        | 11.12% | 7.42% | 13.71%              |
| Co-20Ni-B | 58.94%        | 13.82% | 6.62% | 19.06%              |
| Ni-B      | --            | 90.61% | 3.22% | 100%                |

**Table S2.** Comparison of the OER activities of catalysts from literature.

| Catalyst                                | Substrate | Overpotential<br>(mV vs. RHE)    | Tafel slope<br>(mV dec <sup>-1</sup> ) | Electrolyte | reference |
|-----------------------------------------|-----------|----------------------------------|----------------------------------------|-------------|-----------|
| Co-10Ni-B                               | GC        | 330 mV<br>10 mA cm <sup>-2</sup> | 73.3<br>mV dec <sup>-1</sup>           | 1 M KOH     | This work |
| Co-10Ni-B-sp                            | GC        | 310 mV<br>10 mA cm <sup>-2</sup> | 66<br>mV dec <sup>-1</sup>             | 1 M KOH     | This work |
| Co-B-500°C                              | FTO       | 380 mV<br>10 mA cm <sup>-2</sup> | 45.0<br>mV dec <sup>-1</sup>           | 0.1 M KOH   | S 1       |
| Ni-B-300°C                              | GC        | 380 mV<br>10 mA cm <sup>-2</sup> | 89<br>mV dec <sup>-1</sup>             | 1 M KOH     | S 2       |
| CoBi/GNS                                | GC        | 290 mV<br>10 mA cm <sup>-2</sup> | 53<br>mV dec <sup>-1</sup>             | 1 M KOH     | S 3       |
| Co-B/ZIF 67                             | GC        | 320 mV<br>10 mA cm <sup>-2</sup> | 75<br>mV dec <sup>-1</sup>             | 1 M KOH     | S 4       |
| Co-Mo-B                                 | GC        | 320 mV<br>10 mA cm <sup>-2</sup> | 155<br>mV dec <sup>-1</sup>            | 1 M KOH     | S 5       |
| FeCo <sub>2.3</sub> Ni-B                | GC        | 274 mV<br>10 mA cm <sup>-2</sup> | 38<br>mV dec <sup>-1</sup>             | 1 M KOH     | S 6       |
| NiCo <sub>2</sub> (SOH) <sub>x</sub>    | Ni foam   | 290 mV<br>10 mA cm <sup>-2</sup> | 47<br>mV dec <sup>-1</sup>             | 1 M NaOH    | S 7       |
| NiCoO <sub>2</sub> /C PMRAs             | GC        | 366 mV<br>20 mA cm <sup>-2</sup> | 83.97<br>mV dec <sup>-1</sup>          | 1 M KOH     | S 8       |
| NiCoP                                   | Ni foam   | 320 mV<br>10 mA cm <sup>-2</sup> | 37<br>mV dec <sup>-1</sup>             | 1 M KOH     | S 9       |
| Ni <sub>1.85</sub> Fe <sub>0.15</sub> P | Ni foam   | 270 mV<br>20 mA cm <sup>-2</sup> | 96<br>mV dec <sup>-1</sup>             | 1 M KOH     | S 10      |

## References

1. J. Masa, P. Weide, D. Peeters, I. Sinev, W. Xia, Z. Sun, C. Somsen, M. Muhler and W. Schuhmann, *Advanced Energy Materials*, 2016, **6**, 1502313.
2. J. Masa, I. Sinev, H. Mistry, E. Ventosa, M. de la Mata, J. Arbiol, M. Muhler, B. Roldan Cuenya and W. Schuhmann, *Advanced Energy Materials*, 2017, 1700381.
3. P. Chen, K. Xu, T. Zhou, Y. Tong, J. Wu, H. Cheng, X. Lu, H. Ding, C. Wu and Y. Xie, *Angewandte Chemie*, 2016, **55**, 2488-2492.
4. Y. Li, H. Xu, H. Huang, L. Gao, Y. Zhao and T. Ma, *Electrochemistry Communications*, 2018, **86**, 140-144.
5. S. Gupta, N. Patel, R. Fernandes, S. Hanchate, A. Miotello and D. C. Kothari, *Electrochimica Acta*, 2017, **232**, 64-71.
6. J. M. V. Nsanzimana, Y. Peng, Y. Y. Xu, L. Thia, C. Wang, B. Y. Xia and X. Wang, *Advanced Energy Materials*, 2018, **8**, 1701475.
7. L. Peng, J. Wang, Y. Nie, K. Xiong, Y. Wang, L. Zhang, K. Chen, W. Ding, L. Li and Z. Wei, *ACS Catalysis*, 2017, **7**, 8184-8191.
8. H. Xu, Z.-X. Shi, Y.-X. Tong and G.-R. Li, *Advanced materials*, 2018, 1705442.

9. H. Liang, A. N. Gandi, D. H. Anjum, X. Wang, U. Schwingenschlogl and H. N. Alshareef, *Nano letters*, 2016, **16**, 7718-7725.
10. P. Wang, Z. Pu, Y. Li, L. Wu, Z. Tu, M. Jiang, Z. Kou, I. S. Amini and S. Mu, *ACS applied materials & interfaces*, 2017, **9**, 26001-26007.
